# Supplementary material
Source: Research Square preprint supplement (doi:10.21203/rs.3.rs-8938160/v1)
Supplement: Supplementary file 1 [file 499224b32571ab29d1385fcf.xlsx]

## Sheet: Contact area
Radio-lunate				Scapho-Trapezium
Case	pre	post		Case	pre	post
1	119.3	97		1	69.5	52.4
2	175.6	61.9		2	57.4	60.2
3	247.8	160.6		3	28.8	99.6
4	197.4	170.1		4	57.4	48.9
5	150.7	150.7		5	44.8	28.8
6	144.3	133.2		6	34.7	34
Radio-Scaphoid				Scapho-Trapezoid
Case	pre	post		Case	pre	post
1	172.4	155.5		1	62	73.4
2	82.7	162		2	27.8	37.6
3	127.6	208		3	10.2	68
4	149.7	163.7		4	15	25.6
5	114.3	133.7		5	2.8	11.2
6	93.1	131.5		6	44	64.3
Luno-capitate				Triquetro-hamate
Case	pre	post		Case	pre	post
1	100.3	81.3		1	70.2	77.2
2	47.1	18.9		2	84.8	87
3	113.9	52.8		3	141.1	161.1
4	79.9	71		4	129.4	130.5
5	182	115.6		5	78.8	76.5
6	82.3	13.7		6	125	111

## Sheet: Contact area centroid
Radio-lunate					Scapho-Trapezium
Case	UR	VD	PD		Case	UR	VD	PD
1	0.475941	0.958029	-0.0759		1	-4.47867	-3.30593	-1.21549
2	-0.64721	-0.0144	0.161921		2	1.18905	3.76832	-4.72933
3	-1.35045	2.39117	-0.02205		3	1.4985	3.5004	0.78935
4	-0.15034	1.84301	-0.22521		4	0.256041	3.3698	-1.38502
5	-0.77573	-0.1444	0.321865		5	-0.39615	-2.17574	-1.47449
6	0.139746	3.36582	-0.09722		6	2.76226	6.04269	1.5472
Radio-Scaphoid					Scapho-Trapezoid
Case	UR	VD	PD		Case	UR	VD	PD
1	0.015802	-0.12182	0.043719		1	-1.28283	-3.03899	0.983011
2	-2.42021	1.34169	-0.07319		2	-0.359	4.66915	-4.83822
3	-2.27963	0.336406	-0.22072		3	4.3052	8.34579	-3.30406
4	-0.93768	0.651313	-0.36966		4	0.519959	1.66573	-1.67137
5	0.528254	-0.84146	0.278902		5	-0.77731	-2.14712	-0.78522
6	-0.19586	0.560682	-0.08351		6	2.05123	7.98259	-3.36557
Luno-capitate					Triquetro-hamate
Case	UR	VD	PD		Case	UR	VD	PD
1	-0.38891	-0.21545	0.09607		1	-1.99694	-2.4466	-0.48669
2	1.71254	-5.56382	3.20924		2	0.30898	-0.42767	2.51552
3	-1.71254	5.56382	-3.20924		3	0.94457	0.918853	-0.63773
4	-0.38812	2.1112	0.003999		4	0.305801	0.530532	0.25753
5	0.709408	3.16647	-0.61374		5	-0.3058	-0.53053	-0.25753
6	3.81875	3.56044	-0.10867		6	1.01962	2.90593	-2.92296
	UR	Ulnar to Radial side
	VD	Volar to Dorsal side
	PD	Proximal to Distal side

## Sheet: Bone centroid
Lunate					Scaphoid
Case	UR	VD	PD		Case	UR	VD	PD
1	-0.38264	1.68321	0.088896		1	-1.92764	-1.61757	-0.48913
2	-0.55029	-0.72899	0.63707		2	-1.31456	2.23763	-2.53437
3	-1.94153	0.30768	0.111335		3	-1.12272	1.70996	-1.30696
4	-0.68821	1.44401	0.274383		4	0.607543	0.927165	0.092503
5	-0.16655	-0.24404	-0.02248		5	0.105373	-1.02018	-1.24456
6	0.994063	-0.83746	-0.20296		6	1.12719	1.35187	0.675283
Capitate					Trapezoid
Case	UR	VD	PD		Case	UR	VD	PD
1	-1.05811	-3.08665	1.41629		1	-1.05286	-4.70704	1.95678
2	0.327902	1.0318	-0.02793		2	0.163047	3.3626	-4.66679
3	0.941792	3.0271	-1.09005		3	1.57242	4.70264	-4.5692
4	0.311586	1.5839	-2.29873		4	1.42213	2.3718	-5.82537
5	-1.04598	3.04725	3.66719		5	-0.77573	-0.1444	0.321865
6	2.0456	4.68651	-4.31818		6	-0.33631	-2.7214	-2.03159
Hamate					Trapezium
Case	UR	VD	PD		Case	UR	VD	PD
1	-2.75916	-6.06519	0.525367		1	-3.54262	-6.27222	-0.7976
2	1.94716	-2.41637	3.71982		2	2.45648	4.50534	-7.25585
3	1.5828	1.73888	0.923652		3	2.50749	3.94498	-1.60169
4	1.30627	2.03681	-0.32831		4	2.91788	5.06621	-3.87285
5	0.501056	-2.01777	-1.0644		5	0.8636	-2.82694	-1.76754
6	2.04913	6.49176	-4.26212		6	3.68705	8.92811	0.259594
	UR	Ulnar to Radial side
	VD	Volar to Dorsal side
	PD	Proximal to Distal side
